# Supplementary material for: Poison or Potion: Effects of Sunflower Phenolamides on Bumble Bees and Their Gut Parasite
Source: MDPI journal article supplement (doi:10.3390/biology11040545), 2022-04-01

**Figure S1. Ordination of the phenolamide profiling in sunflower tissues.** The first two axes of the principal component analysis (PCA) are shown and express 89.2% of the total variance. Each point represents a replicate of plant tissues (one symbol per tissue) with superimposition of leaves and corolla (*i.e.*, no detected phenolamides). Each vector represents a variable (phenolamide compound) with N,N'-diferuloyl spermidine (1), N,N',N''-tricoumaroyl spermidine (2), N,N',N'',N'''-tetracoumaroyl spermine (3), N,N',N''-dicoumaroyl feruloyl spermidine (4) and N,N',N'',N'''-tricoumaroyl feruloyl spermine (5).

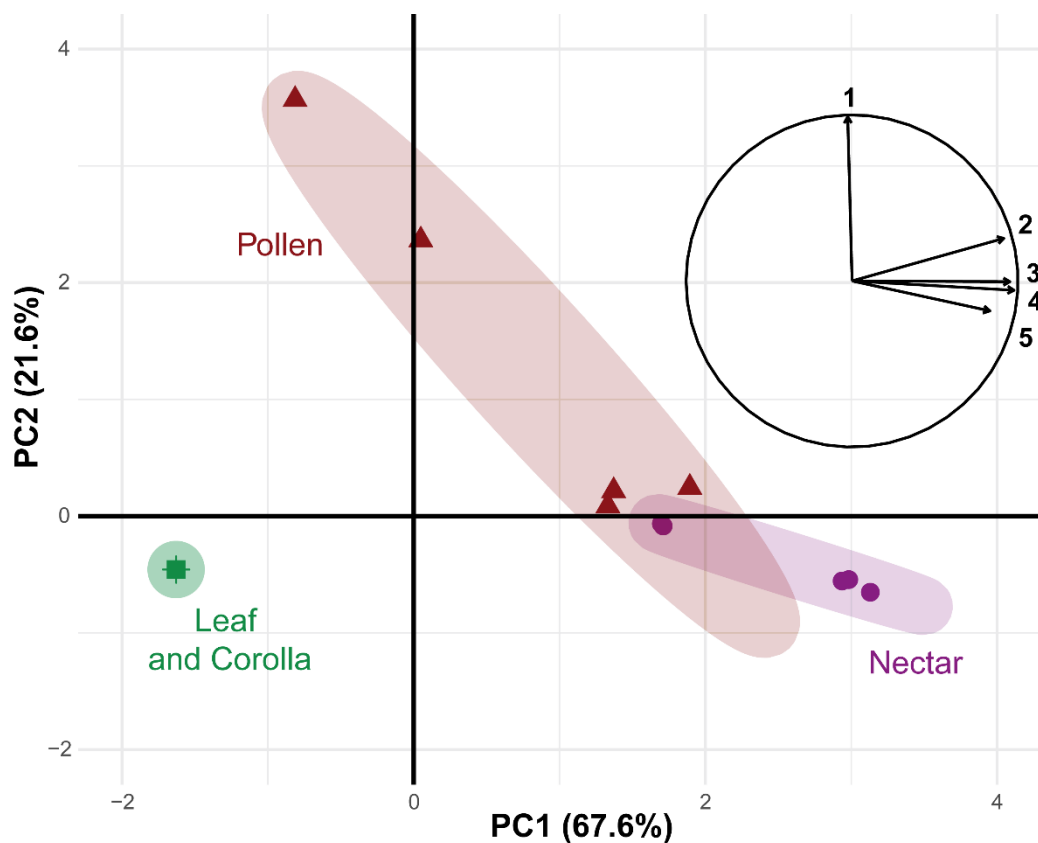

Supplement: s1 [file s1]
