# Supplementary material for: Poison or Potion: Effects of Sunflower Phenolamides on Bumble Bees and Their Gut Parasite
Source: MDPI journal article supplement (doi:10.3390/biology11040545), 2022-04-01
Supplement: s1 [file s1]

1 **Table S1. Model selection table showing candidate models for each analysis.** Models in *italic* are the ones within  
2 the 95% confidence set that were used for model averaging.

| <b>Pollen collection ~</b>                                                                  | <b>AICc</b> | <b>ΔAICc</b> | <b>Weight</b> |
|---------------------------------------------------------------------------------------------|-------------|--------------|---------------|
| Diet * Parasite * Day +<br>(1  <br>Colony:Microcolony)<br>(Gamma distribution,<br>log link) |             |              |               |
| Diet * Parasite *<br>Day                                                                    | 1242.8      | 7.21         | 0.026         |
| Diet * Parasite                                                                             | 1509.6      | 273.98       | 0             |
| <i>Diet * Day</i>                                                                           | 1235.6      | 0            | 0.974         |
| Diet                                                                                        | 1504.8      | 269.18       | 0             |
| Parasite * Day                                                                              | 1352.1      | 116.47       | 0             |
| Parasite                                                                                    | 1564.6      | 328.95       | 0             |
| Day                                                                                         | 1350.3      | 114.73       | 0             |
| Null                                                                                        | 1562.6      | 326.99       | 0             |

  

| <b>Syrup collection ~ Diet</b>                                                      | <b>AICc</b> | <b>ΔAICc</b> | <b>Weight</b> |
|-------------------------------------------------------------------------------------|-------------|--------------|---------------|
| * Parasite * Day + (1  <br>Colony:Microcolony)<br>(Gamma distribution,<br>log link) |             |              |               |
| <i>Diet * Parasite *<br/>Day</i>                                                    | 3515.8      | 3.24         | 0.165         |
| Diet * Parasite                                                                     | 4582.9      | 1070.35      | 0             |
| <i>Diet * Day</i>                                                                   | 3512.6      | 0            | 0.835         |
| Diet                                                                                | 4577.8      | 1065.22      | 0             |
| Parasite * Day                                                                      | 3986.1      | 473.52       | 0             |
| Parasite                                                                            | 4609.7      | 1097.16      | 0             |

|      |        |         |   |
|------|--------|---------|---|
| Day  | 3985.5 | 472.99  | 0 |
| Null | 4608.0 | 1095.43 | 0 |

| <b>Larval ejection ~ Diet *<br/>Parasite + (1  <br/>Colony:Microcolony)<br/>(Binomial distribution,<br/>logit link)</b> | <b>AICc</b> | <b>ΔAICc</b> | <b>Weight</b> |
|-------------------------------------------------------------------------------------------------------------------------|-------------|--------------|---------------|
|-------------------------------------------------------------------------------------------------------------------------|-------------|--------------|---------------|

|                        |       |       |       |
|------------------------|-------|-------|-------|
| <i>Diet * Parasite</i> | 632.2 | 0     | 0.777 |
| <i>Diet</i>            | 634.7 | 2.49  | 0.223 |
| Parasite               | 681.9 | 49.72 | 0     |
| Null                   | 682.6 | 50.34 | 0     |

| <b>Pollen efficacy ~ Diet *<br/>Parasite + (1   Colony)<br/>(Gamma distribution,<br/>log link)</b> | <b>AICc</b> | <b>ΔAICc</b> | <b>Weight</b> |
|----------------------------------------------------------------------------------------------------|-------------|--------------|---------------|
|----------------------------------------------------------------------------------------------------|-------------|--------------|---------------|

|                        |       |       |       |
|------------------------|-------|-------|-------|
| <i>Diet * Parasite</i> | -90.8 | 4.22  | 0.108 |
| <i>Diet</i>            | -95.0 | 0     | 0.892 |
| Parasite               | -7.7  | 87.3  | 0     |
| Null                   | -9.9  | 85.11 | 0     |

| <b>Pollen dilution ~ Diet *<br/>Parasite + (1   Colony)<br/>(Gamma distribution,<br/>log link)</b> | <b>AICc</b> | <b>ΔAICc</b> | <b>Weight</b> |
|----------------------------------------------------------------------------------------------------|-------------|--------------|---------------|
|----------------------------------------------------------------------------------------------------|-------------|--------------|---------------|

|                        |       |       |       |
|------------------------|-------|-------|-------|
| <i>Diet * Parasite</i> | 272.7 | 4.5   | 0.095 |
| <i>Diet</i>            | 268.2 | 0     | 0.905 |
| Parasite               | 318.0 | 49.8  | 0     |
| Null                   | 316.5 | 48.24 | 0     |

| <b>Worker mortality ~</b><br>Diet * Parasite + (1   Colony)<br>(Cox Proportional Hazard Model)                      | <b>AICc</b> | <b>ΔAICc</b> | <b>Weight</b> |
|---------------------------------------------------------------------------------------------------------------------|-------------|--------------|---------------|
| <i>Diet * Parasite</i>                                                                                              | 415.2       | 0.82         | 0.194         |
| <i>Diet</i>                                                                                                         | 414.3       | 0            | 0.292         |
| <i>Parasite</i>                                                                                                     | 414.6       | 0.32         | 0.249         |
| <i>Null</i>                                                                                                         | 414.5       | 0.20         | 0.265         |
| <b>Number of eggs ~ Diet * Parasite + (1   Colony)</b><br>(Negative binomial distribution, log link)                | <b>AICc</b> | <b>ΔAICc</b> | <b>Weight</b> |
| <i>Diet * Parasite</i>                                                                                              | 644.0       | 5.48         | 0.026         |
| <i>Diet</i>                                                                                                         | 639.7       | 1.25         | 0.212         |
| <i>Parasite</i>                                                                                                     | 638.5       | 0            | 0.396         |
| <i>Null</i>                                                                                                         | 638.7       | 0.16         | 0.366         |
| <b>Number of non-isolated larvae ~ Diet * Parasite + (1   Colony)</b><br>(Negative binomial distribution, log link) | <b>AICc</b> | <b>ΔAICc</b> | <b>Weight</b> |
| <i>Diet * Parasite</i>                                                                                              | 699.6       | 5.87         | 0.047         |
| <i>Diet</i>                                                                                                         | 693.8       | 0            | 0.886         |
| <i>Parasite</i>                                                                                                     | 701.2       | 7.44         | 0.021         |
| <i>Null</i>                                                                                                         | 699.7       | 5.93         | 0.046         |

| Number of pre-defecating larvae ~<br>Diet * Parasite + (1  <br>Colony:Microcolony)<br>(Poisson distribution,<br>log link)  | AICc  | ΔAICc | Weight |
|----------------------------------------------------------------------------------------------------------------------------|-------|-------|--------|
| <i>Diet * Parasite</i>                                                                                                     | 472.1 | 0     | 0.73   |
| <i>Diet</i>                                                                                                                | 474.1 | 1.99  | 0.27   |
| Parasite                                                                                                                   | 522.1 | 49.93 | 0      |
| Null                                                                                                                       | 520.0 | 47.85 | 0      |
| Number of post-defecating larvae ~<br>Diet * Parasite + (1  <br>Colony:Microcolony)<br>(Poisson distribution,<br>log link) | AICc  | ΔAICc | Weight |
| <i>Diet * Parasite</i>                                                                                                     | 307.8 | 5.21  | 0.069  |
| <i>Diet</i>                                                                                                                | 302.6 | 0     | 0.931  |
| Parasite                                                                                                                   | 357.2 | 54.64 | 0      |
| Null                                                                                                                       | 355.3 | 52.74 | 0      |
| Number of pupae ~<br>Diet * Parasite + (1  <br>Colony)<br>(Negative binomial<br>distribution, log link)                    | AICc  | ΔAICc | Weight |
| <i>Diet * Parasite</i>                                                                                                     | 452.9 | 0     | 0.645  |
| <i>Diet</i>                                                                                                                | 454.1 | 1.20  | 0.355  |
| Parasite                                                                                                                   | 506.3 | 53.37 | 0      |
| Null                                                                                                                       | 504.2 | 51.24 | 0      |

| <b>Number of non-emerged males ~ Diet * Parasite + (1   Colony)</b><br>(Poisson distribution, log link)         | <b>AICc</b> | <b>ΔAICc</b> | <b>Weight</b> |
|-----------------------------------------------------------------------------------------------------------------|-------------|--------------|---------------|
| <i>Diet * Parasite</i>                                                                                          | 185.1       | 3.79         | 0.084         |
| <i>Diet</i>                                                                                                     | 181.3       | 0            | 0.559         |
| <i>Parasite</i>                                                                                                 | 185.0       | 3.63         | 0.091         |
| <i>Null</i>                                                                                                     | 182.8       | 1.49         | 0.266         |
| <b>Number of emerged males ~ Diet * Parasite + (1   Colony)</b><br>(Negative binomial distribution, log link)   | <b>AICc</b> | <b>ΔAICc</b> | <b>Weight</b> |
| <i>Diet * Parasite</i>                                                                                          | 574.4       | 5.71         | 0.054         |
| <i>Diet</i>                                                                                                     | 568.7       | 0            | 0.946         |
| <i>Parasite</i>                                                                                                 | 651.4       | 82.72        | 0             |
| <i>Null</i>                                                                                                     | 649.5       | 80.78        | 0             |
| <b>Total mass of hatched alive offspring ~ Diet * Parasite + (1   Colony)</b><br>(Gamma distribution, log link) | <b>AICc</b> | <b>ΔAICc</b> | <b>Weight</b> |
| <i>Diet * Parasite</i>                                                                                          | 398         | 5.01         | 0.076         |
| <i>Diet</i>                                                                                                     | 393.0       | 0            | 0.924         |
| <i>Parasite</i>                                                                                                 | 487.7       | 94.66        | 0             |
| <i>Null</i>                                                                                                     | 485.6       | 92.63        | 0             |

| <b>Parasite load ~ Diet *</b><br>Day + (1 <br>Colony:Microcolony)<br>(Negative binomial<br>distribution, log link) | <b>AICc</b> | <b>ΔAICc</b> | <b>Weight</b> |
|--------------------------------------------------------------------------------------------------------------------|-------------|--------------|---------------|
| <i>Diet * Day</i>                                                                                                  | 10459.4     | 0            | 0.991         |
| Diet                                                                                                               | 10747.0     | 287.61       | 0             |
| Day                                                                                                                | 10468.8     | 9.43         | 0.009         |
| Null                                                                                                               | 10752.3     | 292.91       | 0             |
| <b>Fat body content ~</b><br>Diet * Parasite * Caste +<br>(1  Colony)<br>(Gamma distribution,<br>logit link)       | <b>AICc</b> | <b>ΔAICc</b> | <b>Weight</b> |
| <i>Diet * Parasite * Caste</i>                                                                                     | -966.2      | 0            | 0.994         |
| <i>Caste</i>                                                                                                       |             |              |               |
| Diet * Parasite                                                                                                    | -955.7      | 10.58        | 0.005         |
| Diet * Caste                                                                                                       | -952.1      | 14.09        | 0.001         |
| Diet                                                                                                               | -937.4      | 28.81        | 0             |
| Parasite * Caste                                                                                                   | -916.0      | 50.20        | 0             |
| Parasite                                                                                                           | -909.5      | 56.70        | 0             |
| Caste                                                                                                              | -898.7      | 67.56        | 0             |
| Null                                                                                                               | -890.5      | 75.75        | 0             |
| <b>Centroid size ~ Diet *</b><br>Parasite + (1  Colony)<br>(Gamma distribution,<br>log link)                       | <b>AICc</b> | <b>ΔAICc</b> | <b>Weight</b> |

|                                                |                        |              |               |       |
|------------------------------------------------|------------------------|--------------|---------------|-------|
|                                                | <i>Diet * Parasite</i> | 449.1        | 0             | 0.998 |
|                                                | Diet                   | 461.8        | 12.66         | 0.002 |
|                                                | Parasite               | 881.7        | 432.57        | 0     |
|                                                | Null                   | 882.3        | 433.17        | 0     |
| <hr/>                                          |                        |              |               |       |
| <b>Size FA ~ Diet *</b>                        | <b>AICc</b>            | <b>ΔAICc</b> | <b>Weight</b> |       |
| Parasite + (1   Colony)                        |                        |              |               |       |
| (Gamma distribution,<br>log link)              |                        |              |               |       |
|                                                | <i>Diet * Parasite</i> | -4882.8      | 3.35          | 0.158 |
|                                                | <i>Diet</i>            | -4886.2      | 0             | 0.842 |
|                                                | Parasite               | -4841.5      | 44.73         | 0     |
|                                                | Null                   | -4842.4      | 43.76         | 0     |
| <hr/>                                          |                        |              |               |       |
| <b>Size FA (without<br/>outliers) ~ Diet *</b> | <b>AICc</b>            | <b>ΔAICc</b> | <b>Weight</b> |       |
| Parasite + (1   Colony)                        |                        |              |               |       |
| (Gamma distribution,<br>log link)              |                        |              |               |       |
|                                                | <i>Diet * Parasite</i> | -4849.3      | 4.30          | 0.068 |
|                                                | <i>Diet</i>            | -4853.6      | 0             | 0.581 |
|                                                | <i>Parasite</i>        | -4850.3      | 3.36          | 0.108 |
|                                                | <i>Null</i>            | -4851.9      | 1.74          | 0.243 |
| <hr/>                                          |                        |              |               |       |
| <b>Shape FA ~ Diet *</b>                       | <b>AICc</b>            | <b>ΔAICc</b> | <b>Weight</b> |       |
| Parasite + (1   Colony)                        |                        |              |               |       |
| (Gamma distribution,<br>log link)              |                        |              |               |       |
|                                                | <i>Diet * Parasite</i> | -2331.6      | 5.59          | 0.058 |
|                                                | <i>Diet</i>            | -2337.1      | 0             | 0.942 |

|          |         |       |   |
|----------|---------|-------|---|
| Parasite | -2298.2 | 38.92 | 0 |
| Null     | -2300.0 | 37.14 | 0 |

| Shape FA (without outliers) ~ Diet *<br>Parasite + (1   Colony)<br>(Gamma distribution,<br>log link) | AICc    | $\Delta$ AICc | Weight |
|------------------------------------------------------------------------------------------------------|---------|---------------|--------|
| Diet * Parasite                                                                                      | -2447.3 | 6.10          | 0.045  |
| <i>Diet</i>                                                                                          | -2453.4 | 0             | 0.955  |
| Parasite                                                                                             | -2421.9 | 31.45         | 0      |
| Null                                                                                                 | -2423.9 | 29.49         | 0      |
