# Supplementary material for: Poison or Potion: Effects of Sunflower Phenolamides on Bumble Bees and Their Gut Parasite
Source: MDPI journal article supplement (doi:10.3390/biology11040545), 2022-04-01
Supplement: s1 [file s1]

**Table S3. Characterisation of phenolamide profiles in sunflower nectar and pollen.** No phenolamides were found in sunflower leaves and petals.

| Tissue | Compound                                             | Molecular formula<br>[M-H] <sup>-</sup>                                       | Calculated mass<br>[M-H] <sup>-</sup> | Δ ppm |
|--------|------------------------------------------------------|-------------------------------------------------------------------------------|---------------------------------------|-------|
| Nectar |                                                      |                                                                               |                                       |       |
|        | <i>N,N'</i> -diferuloyl spermidine                   | [C <sub>27</sub> H <sub>34</sub> N <sub>3</sub> O <sub>6</sub> ] <sup>-</sup> | 496,2448                              | 0     |
|        | <i>N,N',N''</i> -tricoumaroyl spermidine             | [C <sub>34</sub> H <sub>36</sub> N <sub>3</sub> O <sub>6</sub> ] <sup>-</sup> | 582,2606                              | 0,3   |
|        | <i>N,N',N''</i> -dicoumaroyl feruloyl spermidine     | [C <sub>35</sub> H <sub>38</sub> N <sub>3</sub> O <sub>7</sub> ] <sup>-</sup> | 612,2704                              | 1     |
|        | <i>N,N',N'',N'''</i> -tetracoumaroyl spermine        | [C <sub>46</sub> H <sub>49</sub> N <sub>4</sub> O <sub>8</sub> ] <sup>-</sup> | 785,3549                              | 0,1   |
|        | <i>N,N',N'',N'''</i> -tricoumaroyl feruloyl spermine | [C <sub>47</sub> H <sub>51</sub> N <sub>4</sub> O <sub>9</sub> ] <sup>-</sup> | 815,3654                              | 0,2   |
| Pollen |                                                      |                                                                               |                                       |       |
|        | <i>N,N',N''</i> -tricoumaroyl spermidine             | [C <sub>34</sub> H <sub>36</sub> N <sub>3</sub> O <sub>6</sub> ] <sup>-</sup> | 582,2625                              | 3,6   |
|        | <i>N,N',N''</i> -dicoumaroyl feruloyl spermidine     | [C <sub>35</sub> H <sub>38</sub> N <sub>3</sub> O <sub>7</sub> ] <sup>-</sup> | 612,2734                              | 3,9   |
|        | <i>N,N',N'',N'''</i> -tetracoumaroyl spermine        | [C <sub>46</sub> H <sub>49</sub> N <sub>4</sub> O <sub>8</sub> ] <sup>-</sup> | 785,3571                              | 2,7   |
|        | <i>N,N',N'',N'''</i> -tricoumaroyl feruloyl spermine | [C <sub>47</sub> H <sub>51</sub> N <sub>4</sub> O <sub>9</sub> ] <sup>-</sup> | 815,3744                              | 10,8  |
