# Supplementary material for: Poison or Potion: Effects of Sunflower Phenolamides on Bumble Bees and Their Gut Parasite
Source: MDPI journal article supplement (doi:10.3390/biology11040545), 2022-04-01
Supplement: s1 [file s1]

## Protocol S2. Pollen diet preparation.

Phenolamide extract from sunflower pollen was obtained from ground sunflower pollen pellets by Soxhlet extraction using methanol at 100°C for 30 h. The methanolic extract was then filtrated and evaporated to dryness using a rotavapor (IKA RV8). The extract was finally dissolved in aqueous ethanol solution (1:1 v/v) before addition to the control willow pollen in proportions that mimic phenolamide concentrations of sunflower pollen diet. All treatment diets contained aqueous ethanol (1:1 v/v; 26 – 34 µL/diet g) to control for potential effects of the solvent (see Table A for diet formula). The total phenolamide content of willow pollen pellets, sunflower pollen pellets and phenolamide extract were analysed in triplicates by HPLC-MS/MS (triplicates of 20 – 40 mg) for quantification (expressed as triferuloyl spermidine equivalent, TSE). We found that willow pollen contained  $23.21 \pm 3.22$  mg TSE/g, sunflower pollen  $54.8 \pm 3.74$  mg TSE/g and phenolamide extract  $161.22 \pm 2.24$  mg TSE/g (mean  $\pm$  SD).

**Table S4. Diet formula.** In every treatment, the quantities shown here enabled to feed 15 microcolonies at the onset of the experiment (*i.e.*, when each microcolony was provided with 1 g of pollen candy).

| Diet treatments                       |                       |                          |                                                           |
|---------------------------------------|-----------------------|--------------------------|-----------------------------------------------------------|
|                                       | Control diet (willow) | Natural diet (sunflower) | Supplemented diet (willow added with phenolamide extract) |
| Pollen (g)                            | 15 (willow)           | 15 (sunflower)           | 15 (willow)                                               |
| 65% sugar solution (numbers of drops) | 8                     | 8                        | 0                                                         |
| Aqueous ethanol (v:v, 1:1) (mL)       | 1.5                   | 1                        | 0                                                         |
| Distilled water (mL)                  | 5.5                   | 3                        | 0                                                         |
| Phenolamide extract (mL)              | 0                     | 0                        | 7                                                         |
| Final candy mass (g)                  | 22.23                 | 19.29                    | 23                                                        |
| Ethanol in final candy (µL/g)         | 34                    | 26                       | 29                                                        |
| Pollen in final candy (g/g)           | 0.67                  | 0.78                     | 0.65                                                      |
| Phenolamides in final candy (mg/g)    | 0                     | 42.62                    | 42.37                                                     |
