# Supplementary material for: Poison or Potion: Effects of Sunflower Phenolamides on Bumble Bees and Their Gut Parasite
Source: MDPI journal article supplement (doi:10.3390/biology11040545), 2022-04-01
Supplement: s1 [file s1]

**Table S2. Parameter outputs.** Parameter estimates (PE), standard errors (SE) and 95% confidence intervals (CI) derived from model averaging across the confidence set of models. Significant parameters (*i.e.*, CI not crossing zero) are highlighted in *italic*.

| <b>Pollen collection</b> | <b>Parameter / Level</b>       | <b>PE</b> | <b>SE</b> | <b>Lower CI</b> | <b>Upper CI</b> |
|--------------------------|--------------------------------|-----------|-----------|-----------------|-----------------|
|                          | Natural diet                   | -0.045    | 0.104     | -0.249          | 0.158           |
|                          | <i>Supplemented diet</i>       | -0.407    | 0.102     | -0.607          | -0.206          |
|                          | <i>Day</i>                     | 0.073     | 0.006     | 0.061           | 0.084           |
|                          | <i>Natural diet:Day</i>        | -0.064    | 0.008     | -0.080          | -0.047          |
|                          | Supplemented diet:Day          | -0.004    | 0.008     | -0.020          | 0.012           |
| <b>Syrup collection</b>  | <b>Parameter / Level</b>       | <b>PE</b> | <b>SE</b> | <b>Lower CI</b> | <b>Upper CI</b> |
|                          | <i>Natural diet</i>            | 0.194     | 0.054     | 0.088           | 0.301           |
|                          | Supplemented diet              | 0.079     | 0.054     | -0.028          | 0.185           |
|                          | Parasite                       | 0.015     | 0.039     | -0.062          | 0.092           |
|                          | <i>Day</i>                     | 0.056     | 0.002     | 0.051           | 0.061           |
|                          | Natural diet:Parasite          | -0.005    | 0.031     | -0.066          | 0.055           |
|                          | Supplemented diet:Parasite     | -0.004    | 0.030     | -0.063          | 0.055           |
|                          | <i>Day:Natural diet</i>        | -0.055    | 0.003     | -0.061          | -0.050          |
|                          | <i>Day:Supplemented diet</i>   | -0.018    | 0.003     | -0.024          | -0.012          |
|                          | Day:Parasite                   | -0.001    | 0.004     | -0.008          | 0.006           |
|                          | Day:Natural diet:Parasite      | 0.001     | 0.003     | -0.005          | 0.006           |
|                          | Day:Supplemented diet:Parasite | 0.001     | 0.004     | -0.006          | 0.009           |
| <b>Larval ejection</b>   | <b>Parameter / Level</b>       | <b>PE</b> | <b>SE</b> | <b>Lower CI</b> | <b>Upper CI</b> |

|                         |                            |           |           |                 |                 |
|-------------------------|----------------------------|-----------|-----------|-----------------|-----------------|
|                         | <i>Natural diet</i>        | 1.223     | 0.285     | 0.658           | 1.789           |
|                         | Supplemented diet          | -0.054    | 0.274     | -0.598          | 0.490           |
|                         | Parasite                   | -0.636    | 0.418     | -1.459          | 0.188           |
|                         | Natural diet:Parasite      | 0.575     | 0.455     | -0.324          | 1.474           |
|                         | Supplemented diet:Parasite | 0.457     | 0.420     | -0.374          | 1.287           |
| <b>Pollen efficacy</b>  | <b>Parameter / Level</b>   | <b>PE</b> | <b>SE</b> | <b>Lower CI</b> | <b>Upper CI</b> |
|                         | <i>Natural diet</i>        | -1.328    | 0.135     | -1.596          | -0.534          |
|                         | Supplemented diet          | 0.060     | 0.121     | -0.180          | 0.300           |
|                         | Parasite                   | -0.011    | 0.060     | -0.130          | 0.109           |
|                         | Natural diet:Parasite      | 0.038     | 0.132     | -0.222          | 0.298           |
|                         | Supplemented diet:Parasite | 0.012     | 0.081     | -0.150          | 0.174           |
| <b>Pollen dilution</b>  | <b>Parameter / Level</b>   | <b>PE</b> | <b>SE</b> | <b>Lower CI</b> | <b>Upper CI</b> |
|                         | <i>Natural diet</i>        | 0.343     | 0.050     | 0.244           | 0.441           |
|                         | <i>Supplemented diet</i>   | 0.355     | 0.050     | 0.257           | 0.454           |
|                         | Parasite                   | 0.010     | 0.035     | -0.060          | 0.079           |
|                         | Natural diet:Parasite      | -0.008    | 0.037     | -0.082          | 0.066           |
|                         | Supplemented diet:Parasite | -0.007    | 0.036     | -0.079          | 0.064           |
| <b>Worker mortality</b> | <b>Parameter / Level</b>   | <b>PE</b> | <b>SE</b> | <b>Lower CI</b> | <b>Upper CI</b> |
|                         | Natural diet               | 0.486     | 0.771     | -1.026          | 1.998           |
|                         | Supplemented diet          | 0.663     | 0.954     | -1.208          | 2.534           |
|                         | Parasite                   | 0.423     | 0.786     | -1.117          | 1.962           |
|                         | Natural diet:Parasite      | -0.135    | 0.613     | -1.335          | 1.066           |

|                                         |                            |           |           |                 |                 |
|-----------------------------------------|----------------------------|-----------|-----------|-----------------|-----------------|
|                                         | Supplemented diet:Parasite | -0.342    | 0.880     | -2.067          | 1.384           |
| <b>Number of eggs</b>                   | <b>Parameter / Level</b>   | <b>PE</b> | <b>SE</b> | <b>Lower CI</b> | <b>Upper CI</b> |
|                                         | Natural diet               | -0.023    | 0.135     | -0.292          | 0.246           |
|                                         | Supplemented diet          | -0.110    | 0.250     | -0.603          | 0.382           |
|                                         | Parasite                   | -0.150    | 0.237     | -0.616          | 0.317           |
| <b>Number of non-isolated larvae</b>    | <b>Parameter / Level</b>   | <b>PE</b> | <b>SE</b> | <b>Lower CI</b> | <b>Upper CI</b> |
|                                         | Natural diet               | 0.292     | 0.164     | -0.034          | 0.617           |
|                                         | Supplemented diet          | -0.188    | 0.172     | -0.530          | 0.154           |
|                                         | Parasite                   | -0.010    | 0.068     | -0.145          | 0.124           |
|                                         | Natural diet:Parasite      | 0.011     | 0.081     | -0.150          | 0.172           |
|                                         | Supplemented diet:Parasite | 0.005     | 0.076     | -0.146          | 0.155           |
| <b>Number of pre-defecating larvae</b>  | <b>Parameter / Level</b>   | <b>PE</b> | <b>SE</b> | <b>Lower CI</b> | <b>Upper CI</b> |
|                                         | <i>Natural diet</i>        | -3.018    | 0.668     | -4.338          | -1.698          |
|                                         | Supplemented diet          | -0.568    | 0.386     | -1.333          | 0.197           |
|                                         | Parasite                   | -0.580    | 0.470     | -1.507          | 0.346           |
|                                         | Natural diet:Parasite      | 1.380     | 1.022     | -0.632          | 3.393           |
|                                         | Supplemented diet:Parasite | 0.642     | 0.591     | -0.526          | 1.810           |
| <b>Number of post-defecating larvae</b> | <b>Parameter / Level</b>   | <b>PE</b> | <b>SE</b> | <b>Lower CI</b> | <b>Upper CI</b> |
|                                         | <i>Natural diet</i>        | -2.744    | 0.467     | -3.673          | -1.815          |

|                                    |                            |           |           |                 |                 |
|------------------------------------|----------------------------|-----------|-----------|-----------------|-----------------|
|                                    | Supplemented diet          | -0.104    | 0.243     | -0.587          | 0.379           |
|                                    | Parasite                   | -0.023    | 0.118     | -0.255          | 0.210           |
|                                    | Natural diet:Parasite      | -0.023    | 0.265     | -0.549          | 0.503           |
|                                    | Supplemented diet:Parasite | 0.028     | 0.159     | -0.285          | 0.342           |
| <b>Number of pupae</b>             | <b>Parameter / Level</b>   | <b>PE</b> | <b>SE</b> | <b>Lower CI</b> | <b>Upper CI</b> |
|                                    | <i>Natural diet</i>        | -2.069    | 0.455     | -2.968          | -1.170          |
|                                    | Supplemented diet          | -0.409    | 0.222     | -0.849          | 0.030           |
|                                    | Parasite                   | -0.309    | 0.280     | -0.861          | 0.243           |
|                                    | Natural diet:Parasite      | 0.767     | 0.691     | -0.593          | 2.127           |
|                                    | Supplemented diet:Parasite | 0.346     | 0.351     | -0.347          | 1.039           |
| <b>Number of non-emerged males</b> | <b>Parameter / Level</b>   | <b>PE</b> | <b>SE</b> | <b>Lower CI</b> | <b>Upper CI</b> |
|                                    | Natural diet               | -0.566    | 0.573     | -1.693          | 0.219           |
|                                    | Supplemented diet          | -0.401    | 0.417     | -1.224          | 0.422           |
|                                    | Parasite                   | -0.028    | 0.175     | -0.375          | 0.319           |
|                                    | Natural diet:Parasite      | 0.111     | 0.432     | -0.739          | 0.961           |
|                                    | Supplemented diet:Parasite | 0.015     | 0.207     | -0.396          | 0.427           |
| <b>Number of emerged males</b>     | <b>Parameter / Level</b>   | <b>PE</b> | <b>SE</b> | <b>Lower CI</b> | <b>Upper CI</b> |
|                                    | <i>Natural diet</i>        | -1.699    | 0.191     | -2.079          | -1.318          |
|                                    | <i>Supplemented diet</i>   | -0.363    | 0.119     | -0.600          | -0.125          |
|                                    | Parasite                   | -0.008    | 0.049     | -0.106          | 0.089           |
|                                    | Natural diet:Parasite      | 0.005     | 0.089     | -0.172          | 0.182           |

|                                                      |                               |           |           |                 |                 |
|------------------------------------------------------|-------------------------------|-----------|-----------|-----------------|-----------------|
|                                                      | Supplemented<br>diet:Parasite | 0.003     | 0.056     | -0.108          | 0.114           |
| <hr/>                                                |                               |           |           |                 |                 |
| <b>Total mass of<br/>hatched alive<br/>offspring</b> | <b>Parameter / Level</b>      | <b>PE</b> | <b>SE</b> | <b>Lower CI</b> | <b>Upper CI</b> |
|                                                      | <i>Natural diet</i>           | -1.918    | 0.155     | -2.225          | -1.611          |
|                                                      | <i>Supplemented diet</i>      | -0.410    | 0.146     | -0.700          | -0.120          |
|                                                      | Parasite                      | -0.014    | 0.072     | -0.155          | 0.128           |
|                                                      | Natural diet:Parasite         | 0.029     | 0.127     | -0.221          | 0.280           |
|                                                      | Supplemented<br>diet:Parasite | 0.018     | 0.097     | -0.175          | 0.210           |
| <hr/>                                                |                               |           |           |                 |                 |
| <b>Parasite load</b>                                 | <b>Parameter / Level</b>      | <b>PE</b> | <b>SE</b> | <b>Lower CI</b> | <b>Upper CI</b> |
|                                                      | Natural diet                  | 0.002     | 0.180     | -0.350          | 0.355           |
|                                                      | <i>Supplemented diet</i>      | 0.441     | 0.170     | 0.109           | 0.774           |
|                                                      | <i>Day</i>                    | 0.064     | 0.005     | 0.054           | 0.074           |
|                                                      | Natural diet:Day              | -0.010    | 0.008     | -0.025          | 0.004           |
|                                                      | Supplemented<br>diet:Day      | -0.011    | 0.007     | -0.025          | 0.002           |
| <hr/>                                                |                               |           |           |                 |                 |
| <b>Fat body<br/>content</b>                          | <b>Parameter / Level</b>      | <b>PE</b> | <b>SE</b> | <b>Lower CI</b> | <b>Upper CI</b> |
|                                                      | <i>Natural diet</i>           | -0.826    | 0.155     | -1.130          | -0.523          |
|                                                      | <i>Supplemented diet</i>      | -0.757    | 0.154     | -1.060          | -0.455          |
|                                                      | <i>Parasite</i>               | -0.466    | 0.157     | -0.774          | -0.157          |
|                                                      | <i>Caste</i>                  | -0.459    | 0.158     | -0.767          | -0.150          |
|                                                      | Natural diet:Parasite         | 0.335     | 0.212     | -0.080          | 0.750           |
|                                                      | Supplemented<br>diet:Parasite | 0.229     | 0.213     | -0.189          | 0.646           |
|                                                      | <i>Natural diet:Caste</i>     | 0.582     | 0.216     | 0.159           | 1.005           |

|                         | Supplemented diet:Caste          | 0.259                 | 0.212  | -0.156   | 0.674    |          |
|-------------------------|----------------------------------|-----------------------|--------|----------|----------|----------|
|                         | Parasite:Caste                   | -0.012                | 0.217  | -0.437   | 0.413    |          |
|                         | Natural diet:Parasite:Caste      | -0.032                | 0.300  | -0.620   | 0.556    |          |
|                         | Supplemented diet:Parasite:Caste | -0.027                | 0.292  | -0.600   | 0.546    |          |
| Centroid size           | Parameter / Level                | PE                    | SE     | Lower CI | Upper CI |          |
|                         | <i>Natural diet</i>              | -0.267                | 0.012  | -0.290   | -0.243   |          |
|                         | <i>Supplemented diet</i>         | -0.030                | 0.012  | -0.053   | -0.007   |          |
|                         | Parasite                         | 0.015                 | 0.012  | -0.008   | 0.038    |          |
|                         | Natural diet:Parasite            | 0.032                 | 0.017  | 0.000    | 0.065    |          |
|                         | Supplemented diet:Parasite       | 0.004                 | 0.017  | -0.029   | 0.036    |          |
| Size FA                 | Parameter / Level                | PE                    | SE     | Lower CI | Upper CI |          |
|                         | <i>Natural diet</i>              | 0.374                 | 0.162  | 0.055    | 0.694    |          |
|                         | <i>Supplemented diet</i>         | 0.990                 | 0.170  | 0.655    | 1.324    |          |
|                         | Parasite                         | -0.001                | 0.080  | -0.159   | 0.157    |          |
|                         | Natural diet:Parasite            | -0.030                | 0.133  | -0.292   | 0.232    |          |
|                         | Supplemented diet:Parasite       | 0.048                 | 0.159  | -0.265   | 0.361    |          |
| Size (without outliers) | FA                               | Parameter / Level     | PE     | SE       | Lower CI | Upper CI |
|                         |                                  | Natural diet          | 0.197  | 0.180    | -0.157   | 0.552    |
|                         |                                  | Supplemented diet     | 0.060  | 0.115    | -0.168   | 0.287    |
|                         |                                  | Parasite              | -0.008 | 0.059    | -0.125   | 0.109    |
|                         |                                  | Natural diet:Parasite | -0.015 | 0.085    | -0.182   | 0.151    |

|                                        |                            |           |           |                 |                 |
|----------------------------------------|----------------------------|-----------|-----------|-----------------|-----------------|
|                                        | Supplemented diet:Parasite | 0.006     | 0.069     | -0.130          | 0.142           |
| <b>Shape FA</b>                        | <b>Parameter / Level</b>   | <b>PE</b> | <b>SE</b> | <b>Lower CI</b> | <b>Upper CI</b> |
|                                        | <i>Natural diet</i>        | 0.182     | 0.043     | 0.098           | 0.266           |
|                                        | <i>Supplemented diet</i>   | 0.272     | 0.043     | 0.188           | 0.356           |
|                                        | Parasite                   | 0.001     | 0.015     | -0.028          | 0.030           |
|                                        | Natural diet:Parasite      | -0.002    | 0.021     | -0.044          | 0.040           |
|                                        | Supplemented diet:Parasite | 0.001     | 0.021     | -0.039          | 0.042           |
| <b>Shape FA<br/>(without outliers)</b> | <b>Parameter / Level</b>   | <b>PE</b> | <b>SE</b> | <b>Lower CI</b> | <b>Upper CI</b> |
|                                        | <i>Natural diet</i>        | 0.181     | 0.031     | 0.120           | 0.241           |
|                                        | <i>Supplemented diet</i>   | 0.124     | 0.031     | 0.063           | 0.185           |
