# Supplementary material for: Poison or Potion: Effects of Sunflower Phenolamides on Bumble Bees and Their Gut Parasite
Source: Biology (Basel). 2022 Apr 1;11(4):545. doi: 10.3390/biology11040545 (PMC9030180; doi:10.3390/biology11040545)
Supplement: Supplementary file 1 [file biology-11-00545-s001.zip]

Archive with 7 entries (7 files):
- Figure S1.pdf
- Protocol S1.pdf
- Protocol S2.pdf
- Protocol S3.pdf
- Table S1.pdf
- Table S2.pdf
- Table S3.pdf
